# Supplementary material for: Reproductive Isolation among Sympatric Molecular Forms of An. gambiae from Inland Areas of South-Eastern Senegal
Source: PubMed Central journal article supplement (PMC4123975; doi:10.1371/journal.pone.0104622), 2014-08-06
Supplement: pone.0104622.s001.pdf [file pone.0104622.s001.pdf]

## Supporting Information S1

Table: Detailed characteristics of the studied villages

| Transects  | Sampling Sites   | Latitude N   | Longitude W  | Area type          | Main human activities | Distance to nearest water points | Habitats*                       | Use of pesticide | Presence of LLINs | No. houses                  | Livestock                   |
|------------|------------------|--------------|--------------|--------------------|-----------------------|----------------------------------|---------------------------------|------------------|-------------------|-----------------------------|-----------------------------|
| Transect 1 | Neteboulou       | 13°34'70.0"  | 13°47'08.2"  | Semi-urban         | Agro pastoral         | Neteboulou river<1km             | corrugated iron                 | Yes              | Yes               | 111                         | Ovine, caprin poultry       |
|            | Tourema          | 13°32'75.3"  | 13°46'47.1"  | Rural              | Agro pastoral         | Gouloumbou river ( 1km)          | corrugated iron, thatched roofs | Yes              | Yes               | 14                          | Bovine, poul                |
|            | Gouloumbou       | 13°27'93.1"  | 13°42'59.1"  | Semi-urban         | Agro pastoral & trade | Gouloumbou river (5m)            | corrugated iron                 | Yes              | Yes               | 15                          | ovine, caprin volaille      |
|            | Afia             | 13°25'68.0"  | 13°46'18.3"  | Semi-urban         | Cash crop (Banana)    | Gouloumbou river <2km            | corrugated iron, thatched roofs | Yes              | Yes               | 503                         | ovine, caprin volaille      |
|            | Temento Malede   | 13°26'83.3"  | 13°41'11.9"  | Rural              | Agro pastoral         | Niaoule river à 500m             | thatched roofs                  | Yes              | Yes               | 11                          | bovin et vola               |
|            | Sare Sidy        | 13°25'35.0"  | 13°40'77.1"  | Rural              | Agro pastoral         | Niaoule river <3km               | corrugated iron, thatched roofs | Yes              | Yes               | 24                          | bovin et vola               |
|            | Sankagne         | 13°23'17.0"  | 13°44'58.0"  | Semi-urban         | Cash crop (Banana)    | Gouloumbou <2km                  | corrugated iron                 | Yes              | Yes               | 525                         | ovine, caprin volaille      |
|            | Dialiko          | 13°21'95.1"  | 13°38'64.5"  | Rural              | Agro pastoral         | Gouloumbou <3km                  | thatched roofs, corrugated iron | Yes              | Yes               | 122                         | bovine, ovine caprine, poul |
|            | Nguene           | 13°21'18.2"  | 13°40'07.1"  | Rural              | Cash crop (Banana)    | Gouloumbou <1km                  | thatched roofs                  | Yes              | Yes               | 55                          | bovine, ovine caprine, poul |
|            | Koar             | 13°20'19.16" | 13°37'02.86" | Rural              | Cash crop (Banana)    | Gouloumbou <2km                  | thatched roofs                  | Yes              | Yes               | 145                         | bovine, ovine caprine, poul |
| Saal       | 13°16'33.9"      | 13°36'81.0"  | Rural        | Cash crop (Banana) | Gouloumbou <2km       | thatched roofs                   | Yes                             | Yes              | 93                | bovine, ovine caprine, poul |                             |
| Transect 2 | Tamba Soce       | 13°46'35.0"  | 13°40'62.8"  | Semi-urban         | Agro pastoral         | Rainy temporary pools            | corrugated iron, thatched roofs | Yes              | Yes               | 50                          | ovine, caprin volaille      |
|            | Djounkore Mafing | 13°41'73.5"  | 13°38'77.4"  | Rural              | Agro pastoral         | Rainy temporary pools            | thatched roofs, corrugated iron | Yes              | Yes               | 12                          | ovine, caprin volaille      |
|            | Madina Dian      | 13°33'96.4"  | 13°33'71.6"  | Rural              | Agro pastoral & trade | Rainy temporary pools            | thatched roofs, corrugated iron | Yes              | Yes               | 44                          | ovine, caprin volaille      |
|            | Missirah         | 13°31'53.8"  | 13°30'81.2"  | Urban              | Agro pastoral & trade | Rainy temporary pools            | corrugated iron, thatched       | Yes              | Yes               | 800                         | ovine, caprin volaille      |

|                  |              |              |       |                       |                       |                                          |     |     |     |                                 |
|------------------|--------------|--------------|-------|-----------------------|-----------------------|------------------------------------------|-----|-----|-----|---------------------------------|
| Barkeyel         | 13°28'40.47" | 13°27'15.62" | Rural | Agro pastoral         | Rainy temporary pools | roofs<br>thatched roofs, corrugated iron | Yes | Yes | 35  | bovine, ovine, caprine, poultry |
| Gourel Ndiapalde | 13°26'17.8"  | 13°25'53.4"  | Rural | Agro pastoral & trade | Rainy temporary pools | thatched roofs, corrugated iron          | Yes | Yes | 35  | ovine, caprine, poultry         |
| Bira             | 13°24'05.91" | 13°28'00.04" | Rural | Agro pastoral         | Rainy temporary pools | thatched roofs, corrugated iron          | Yes | Yes | 131 | ovine, caprine, poultry         |
| Badi             | 13°22'65.3"  | 13°22'53.3"  | Rural | Agro pastoral & trade | Nieriko river <2km    | thatched roofs, corrugated iron          | Yes | Yes | 53  | ovine, caprine, poultry         |
| Wassadou         | 13°21'30.8"  | 13°20'94.1"  | Rural | Agro pastoral & trade | Nieriko river (500m)  | thatched roofs, corrugated iron          | Yes | Yes | 214 | ovine, caprine, poultry         |

---

\*the first is more abundant
