# Supplementary material for: Reproductive Isolation among Sympatric Molecular Forms of An. gambiae from Inland Areas of South-Eastern Senegal
Source: PubMed Central journal article supplement (PMC4123975; doi:10.1371/journal.pone.0104622), 2014-08-06
Supplement: pone.0104622.s002.pdf [file pone.0104622.s002.pdf]

## SUPPORTING INFORMATION S2

### Text: Estimation of Global Moran's I statistic and Local $G_i^*(d)$ statistic

#### - Global Moran's I statistic

The global spatial autocorrelation statistical method was used to measure the correlation among neighboring sites, to find the patterns and the levels of spatial clustering. The Moran's I statistic is calculated by the following formula:

$$I = \frac{N}{S_O} \sum_i \sum_j w_{ij} \frac{(x_i - u)(x_j - u)}{\sum_i (x_i - u)^2}, \quad (1)$$

where  $N$  is the number of sites;  $w_{ij}$  is the element in the spatial weight matrix corresponding to the observation pair  $i, j$ ; and  $x_i$  and  $x_j$  are observations for areas  $i$  and  $j$  with mean  $u$  and

$$S_O = \sum_i \sum_j w_{ij} \quad (2)$$

The first step in the spatial autocorrelation analysis is to construct a spatial weight matrix that contains information about the neighborhood structure for each site. Adjacency is defined as immediately neighboring sites, inclusive of the site itself. Non-neighboring sites are given a weight of zero.

#### - Local $G_i^*(d)$ statistic

The local  $G_i^*(d)$  statistic (local G-statistic) is used to test the statistical significance of local clusters of M/S hybrids frequencies, and to determine the spatial extent of these clusters. The local G-statistic is useful for identifying individual members of local clusters by determining the spatial dependence and relative magnitude between a site and neighboring sites. The local G-statistic can be written as follows:

$$G_i^*(d) = \frac{\sum_j w_{ij}(d)x_j - W_i \bar{x}}{s \sqrt{\frac{(nS_{1i} - W_i^2)}{(n-1)}}}, \text{ for all } j \quad (3)$$

where  $x$  is a measure of the M/S hybrids frequencies within a given polygon (i.e., each site);  $w_{ij}$  is a spatial weight that defines neighboring sites  $j$  to  $i$ ;  $W_i$  is the sum of the weights  $w_{ij}$ ,

$$\bar{x} = \frac{1}{n} \sum_j x_j \quad S_{1i} = \sum_j w_{ij}^2, \quad s^2 = \frac{1}{n} \sum_j x_j^2 - \bar{x}^2.$$

Developing the spatial weights  $w_{ij}$  is the first step to calculating  $G_i^*(d)$ . The spatial weight matrix includes  $w_{ij} = 1$ . Non-neighboring sites are given a weight of zero.

The local G-statistic includes the value in the calculation at  $i$ . Assuming that  $G_i^*(d)$  is approximately normally distributed, the output of  $G_i^*(d)$  can be calculated as a standard normal variant with an associated probability from the z-score distribution. Statistically significant (at a level of 0.05) clusters of sites with high M/S frequencies were identified with Z scores  $>1.96$ . Clustered sites with low M/S frequencies were identified with Z scores  $<-1.96$ .

| Sites | Z scores |
|-------|----------|
|-------|----------|

|                  |            |
|------------------|------------|
| Neteboulou       | 0,02680303 |
| Tourema          | 0,02680303 |
| Gouloumbou       | 1,22336807 |
| Afia             | 2,21740575 |
| Temento Malede   | 1,41206487 |
| Sare Sidy        | 1,24698827 |
| Sankagne         | 1,75113205 |
| Dialiko          | -1,0364073 |
| Nguene           | -1,0364073 |
| Koar             | -1,9423252 |
| Saal             | -1,1861733 |
| Tamba Soce       | 2,02274922 |
| Djounkore Mafing | 2,02274922 |
| Madina Dian      | 0,0143648  |
| Missirah         | 0,0143648  |
| Barkeyel         | -1,3829601 |
| Gourel Ndiapalde | -1,7608864 |
| Bira             | -1,3829601 |
| Badi             | -1,1169364 |
| Wassadou         | -1,0869621 |

Table: Z scores for each of the 20 sites

(Z score>0 indicates a clustering trend of high MS hybrids frequencies and Z score<0 indicates a clustering trend of low MS hybrids frequencies.

## References

Moran PAP (1948) The interpretation of statistical maps. J R Stat Soc Series B Stat Methodol 10:243–251.

Getis A, Ord JK (1992) The analysis of spatial association by use of distance statistics. Geogr Anal 24:189–206.
