# Supplementary material for: Reproductive Isolation among Sympatric Molecular Forms of An. gambiae from Inland Areas of South-Eastern Senegal
Source: PubMed Central journal article supplement (PMC4123975; doi:10.1371/journal.pone.0104622), 2014-08-06
Supplement: pone.0104622.s003.pdf [file pone.0104622.s003.pdf]

### SUPPORTING INFORMATION S3

Figures. Temporal variations of the frequencies of *An. arabiensis* and *An. gambiae* in each of the two transects from July to december 2010.

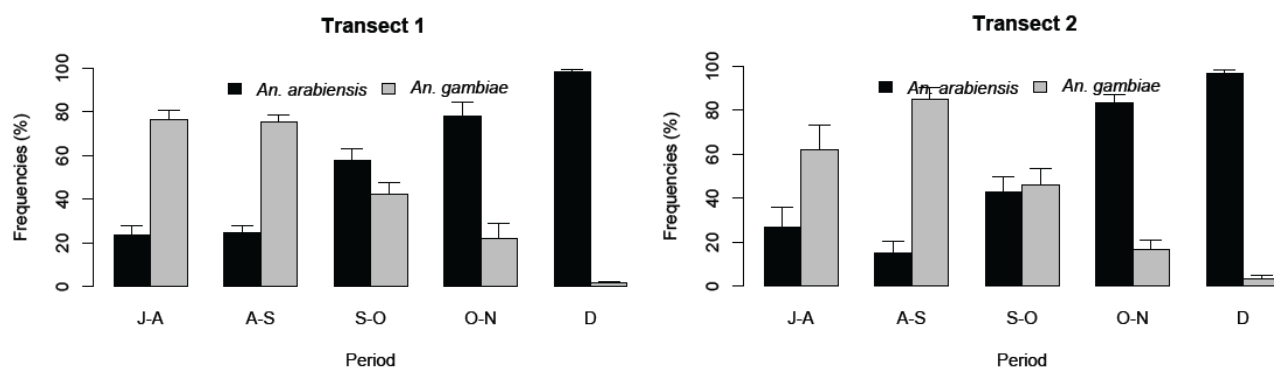

A similar trend is observed for the two transects when considering the two species. The highest frequencies of *An. arabiensis* are observed at the end of the rainy season whereas for *An. gambiae* the highest frequencies are observed at the beginning of the rainy season. These variations were significantly different (see table below).

Table: Comparison of the mean frequencies of *An. gambiae* and *An. arabiensis* between the two transects

| Transects/Period |                       | J-A  | A-S   | S-O   | O-N   | D     | F     | p     |        |
|------------------|-----------------------|------|-------|-------|-------|-------|-------|-------|--------|
| Transect 1       | <i>An. arabiensis</i> | mean | 23.72 | 24.61 | 57.62 | 77.83 | 98.50 | 53.01 | <0.001 |
|                  |                       | ±se  | 4.25  | 3.18  | 5.32  | 6.66  | 0.90  |       |        |
|                  | <i>An. gambiae</i>    | mean | 76.28 | 75.39 | 42.38 | 22.17 | 1.50  |       |        |
|                  |                       | ±se  | 4.25  | 3.18  | 5.32  | 6.66  | 0.90  |       |        |
| Transect 2       | <i>An. arabiensis</i> | mean | 26.92 | 15.04 | 42.85 | 83.24 | 96.77 | 35.18 | <0.001 |
|                  |                       | ±se  | 9.06  | 5.37  | 6.97  | 4.10  | 1.80  |       |        |
|                  | <i>An. gambiae</i>    | mean | 61.97 | 84.96 | 46.04 | 16.76 | 3.23  |       |        |
|                  |                       | ±se  | 11.43 | 5.37  | 7.28  | 4.10  | 1.80  |       |        |
